# Supplementary material for: Molecular characteristics of collagen extracted from the starry triggerfish skin and its potential in the development of biodegradable packaging film
Source: Royal Society of Chemistry journal article supplement (doi:10.1039/c6ra01275b), 2016-01-01
Supplement: c6ra01275b1.pdf [file c6ra01275b1.pdf]

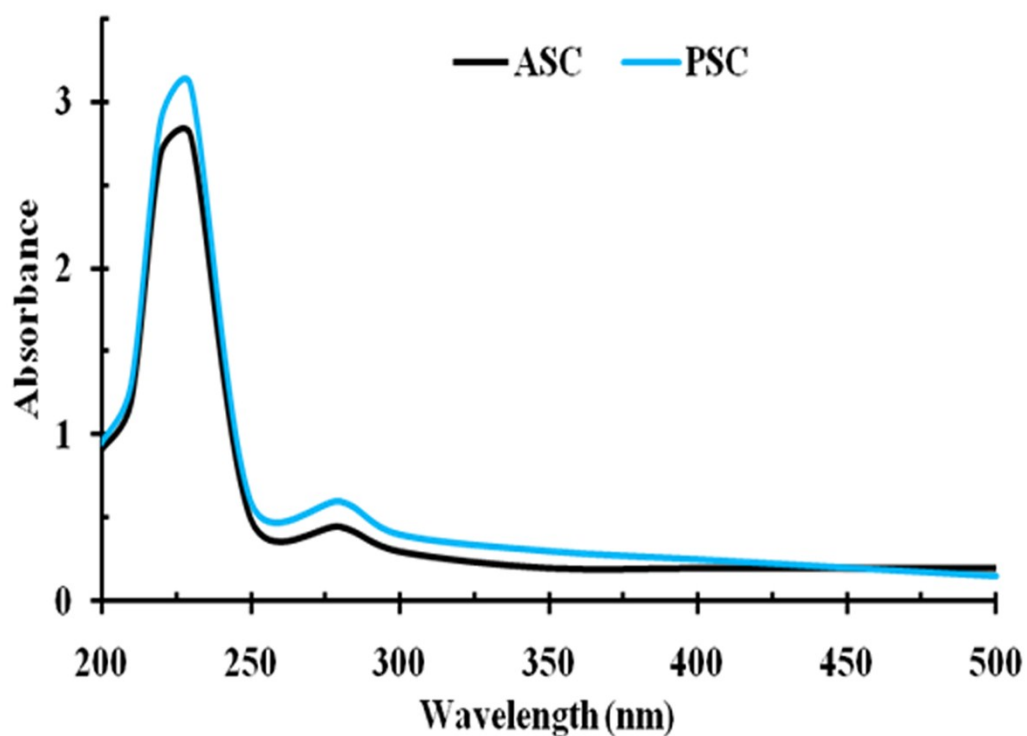

**Fig. S1.** UV-Vis spectra of ASC and PSC from the skin of starry triggerfish. ASC: acid solubilised collagen and PSC: pepsin solubilised collagen.

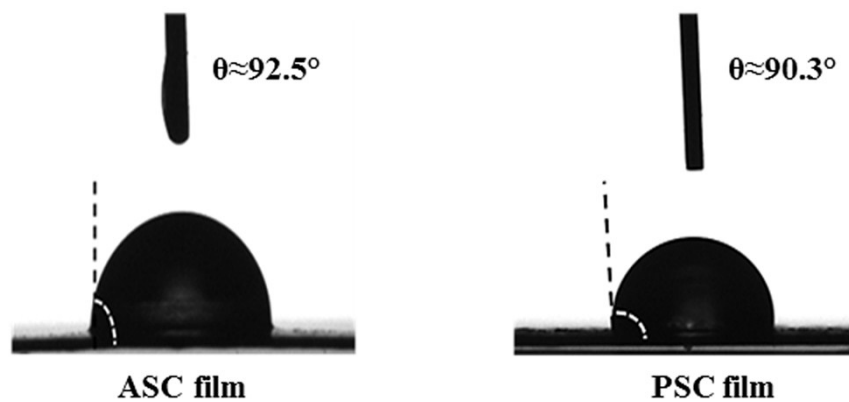

**Fig. S2.** Water contact angle ( $\theta$ ) of ASC and PSC based films prepared by casting technique. ASC: acid solubilised collagen and PSC: pepsin solubilised collagen.
